# Supplementary material for: Predictors of multiple injuries in individual distance runners: A retrospective study of 75,401 entrants in 4 annual races–SAFER XX
Source: PubMed Central journal article supplement — J Sport Health Sci. 2021 Nov 18;11(3):339–46. doi: 10.1016/j.jshs.2021.11.002 (PMC9189693; doi:10.1016/j.jshs.2021.11.002), 2021-11-18
Supplement: mmc1.pdf [file mmc1.pdf]

1 **Predictors of multiple injuries in individual distance runners: A retrospective study of**  
2 **75,401 entrants in 4 annual races – SAFER XX**

3

4 Sonja Swanevelder<sup>a</sup>, Nicola Sewry<sup>b,c</sup>, Martin Schwellnus<sup>b,c,d</sup>, Esme Jordaan<sup>a,e</sup>

5 <sup>a</sup> Biostatistics Unit, South African Medical Research Council, South Africa

6 <sup>b</sup> Sport, Exercise Medicine and Lifestyle Institute (SEMLI), Faculty of Health Sciences,  
7 University of Pretoria, South Africa

8 <sup>c</sup> International Olympic Committee (IOC) Research Centre, South Africa

9 <sup>d</sup> Emeritus Professor of Sport and Exercise Medicine, Faculty of Health Sciences, University  
10 of Cape Town, South Africa

11 <sup>e</sup> Statistics and Population Studies Department, University of the Western Cape

12

13

14 **Running title: Predictors of multiple injuries in runners**

15

16 **Supplementary Tables**

17 **Supplementary Table 1.** Example of how the Cumulative number of injuries & Number of  
 18 races/years ran were used to calculate the average number of injuries per year for an individual runner  
 19 (only for 0.5, 1, 1.5, 2, 2.5, and 3).

| Average number of injuries per year | Cumulative number of injuries | Number of years entered | Number of study entrants |
|-------------------------------------|-------------------------------|-------------------------|--------------------------|
| 0.25                                | 1                             | 4                       | 449                      |
| 0.33                                | 1                             | 3                       | 1372                     |
| 0.5                                 | 1                             | 2                       | 2692                     |
|                                     | 2                             | 4                       | 179                      |
| 0.67                                | 2                             | 3                       | 464                      |
| 0.75                                | 3                             | 4                       | 84                       |
|                                     | 1                             | 1                       | 4257                     |
|                                     | 2                             | 2                       | 600                      |
|                                     | 3                             | 3                       | 142                      |
| 1                                   | 4                             | 4                       | 36                       |
|                                     | 5                             | 4                       | 9                        |
|                                     | 4                             | 3                       | 25                       |
| 1.25                                | 5                             | 4                       | 9                        |
| 1.33                                | 4                             | 3                       | 25                       |
|                                     | 3                             | 2                       | 85                       |
| 1.5                                 | 6                             | 4                       | 2                        |
|                                     | 5                             | 3                       | 6                        |
| 1.67                                | 5                             | 3                       | 6                        |
| 1.75                                | 7                             | 4                       | 1                        |
|                                     | 2                             | 1                       | 153                      |
| 2                                   | 4                             | 2                       | 10                       |
|                                     | 6                             | 3                       | 1                        |
| 2.5                                 | 5                             | 2                       | 1                        |
| 3                                   | 3                             | 1                       | 8                        |

20

21

22 **Supplementary Table 2.** Frequency distribution of the average number of injuries per year for an  
 23 individual runner and MIR categories.

| Average number of injuries per year ( <i>n</i> ) |        | MIR ( <i>n</i> ) |              |        |
|--------------------------------------------------|--------|------------------|--------------|--------|
| 0                                                | 64,825 | 0                | Very low     | 64,825 |
| 0.25                                             | 449    |                  |              |        |
| 0.33                                             | 1,372  |                  |              |        |
| 0.5                                              | 2,871  | <1               | Low          | 5240   |
| 0.67                                             | 464    |                  |              |        |
| 0.75                                             | 84     |                  |              |        |
| 1                                                | 5,035  | 1                | Intermediate | 5,035  |
| 1.25                                             | 9      |                  |              |        |
| 1.33                                             | 25     |                  |              |        |
| 1.5                                              | 87     |                  |              |        |
| 1.67                                             | 6      |                  |              |        |
| 1.75                                             | 1      | >1               | High         | 301    |
| 2                                                | 164    |                  |              |        |
| 2.5                                              | 1      |                  |              |        |
| 3                                                | 8      |                  |              |        |

24

25 Abbreviation: MIR = multiple injury risk.

26

27 **Supplementary Table 3.** The profile by age groups, sex, and race distance of all race entrants and  
 28 entrants who gave consent to participate in this study.

|                      |         | All Race Entrants<br>( <i>n</i> = 106,743) |      | Consenting Entrants for this study<br>( <i>n</i> = 75,401) |      | <i>p</i> value      |
|----------------------|---------|--------------------------------------------|------|------------------------------------------------------------|------|---------------------|
|                      |         | <i>n</i>                                   | %    | <i>n</i>                                                   | %    |                     |
|                      | ≤30     | 27,710                                     | 26.0 | 19,808                                                     | 26.2 |                     |
| Age groups<br>(year) | 31–40   | 35,049                                     | 32.8 | 24,636                                                     | 32.7 | 0.4338              |
|                      | 41–50   | 26,964                                     | 25.3 | 19,058                                                     | 25.3 |                     |
|                      | > 50    | 17,020                                     | 15.9 | 11,899                                                     | 15.8 |                     |
| Sex                  | Males   | 61,815                                     | 57.9 | 43,318                                                     | 57.5 | 0.0503              |
|                      | Females | 44,928                                     | 42.1 | 32,083                                                     | 42.5 |                     |
| Race distance        | 21.1 km | 64,740                                     | 60.7 | 46,310                                                     | 61.4 | 0.0009 <sup>a</sup> |
|                      | 56.0 km | 42,003                                     | 39.3 | 29,091                                                     | 38.6 |                     |

29

30 <sup>a</sup> Study participants significantly different from all race entrants (*p* < 0.05)

31

32 **Supplementary Table 4.** The frequencies (% and 95%CI) of race entrants for each multiple injury  
33 risk category ( $n = 75,401$ ).

| MIR category                    | $n$    | % <sup>b</sup> | 95%CI     |
|---------------------------------|--------|----------------|-----------|
| High (avg > 1)                  | 301    | 0.4            | 0.4–0.5   |
| Intermediate (avg = 1)          | 5,035  | 7.2            | 7.0–7.4   |
| Low (avg < 1)                   | 5,240  | 8.7            | 8.5–8.9   |
| Very low (avg = 0) <sup>a</sup> | 64,825 | 83.7           | 83.2–84.2 |

34

35 <sup>a</sup> baseline/reference category

36 <sup>b</sup> modelling accounting for correlated data (entrants)

37 Abbreviation: 95%CI = 95% confidence interval.

38

39 **Supplementary Table 5.** The frequency (%), OR, and 95%CI for each multiple injury risk category  
 40 in race entrants by sex (unadjusted).

| MIR category          | Male ( <i>n</i> = 43,318) |                  |               |                | Female ( <i>n</i> = 32,083) |                  |
|-----------------------|---------------------------|------------------|---------------|----------------|-----------------------------|------------------|
|                       | <i>n</i>                  | % (95%CI)        | OR (95%CI)    | <i>p</i> value | <i>n</i>                    | % (95%CI)        |
| High                  | 173                       | 0.4 (0.3–0.5)    | 1.0 (0.8–1.3) | 0.9280         | 128                         | 0.4 (0.3–0.5)    |
| Intermediate          | 2918                      | 6.7 (6.5–7.0)    | 1.0 (1.0–1.1) | 0.3430         | 2117                        | 6.6 (6.3–6.9)    |
| Low                   | 3,177                     | 7.3 (7.0–7.7)    | 1.2 (1.1–1.2) | <0.0001        | 2063                        | 6.4 (6.1–6.8)    |
| Very low <sup>a</sup> | 37,050                    | 85.5 (85.0–86.0) | 1.0           |                | 27,775                      | 86.6 (86.0–87.1) |

41

42 <sup>a</sup> baseline/reference category

43 Abbreviations: 95%CI = 95% confidence interval; MIR = multiple injury risk; OR = odds ratio.

44

45

46 **Supplementary Table 6.** The frequency (%), OR, and 95% CI for each multiple injury risk category in race entrants by age groups (unadjusted).

| MIR category          | >40 years <sup>b</sup> ( <i>n</i> = 30,957) |                  |               |                | 31–40 years ( <i>n</i> = 24,636) |                  |               |                | ≤30 years ( <i>n</i> = 19,808) |                  |
|-----------------------|---------------------------------------------|------------------|---------------|----------------|----------------------------------|------------------|---------------|----------------|--------------------------------|------------------|
|                       | <i>n</i>                                    | % (95% CI)       | OR (95% CI)   | <i>p</i> value | <i>n</i>                         | % (95% CI)       | OR (95% CI)   | <i>p</i> value | <i>n</i>                       | % (95% CI)       |
| High                  | 169                                         | 0.6 (0.4–0.7)    | 2.4 (1.7–3.5) | <0.0001        | 84                               | 0.3 (0.3–0.4)    | 1.5 (1.0–2.2) | 0.0780         | 48                             | 0.2 (0.2–0.3)    |
| Intermediate          | 2164                                        | 7.0 (6.7–7.3)    | 1.3 (1.2–1.4) | <0.0001        | 1696                             | 6.9 (6.5–7.2)    | 1.2 (1.1–1.3) | <0.0001        | 1175                           | 5.9 (5.6–6.3)    |
| Low                   | 2802                                        | 9.1 (8.6–9.5)    | 2.3 (2.1–2.6) | <0.0001        | 1612                             | 6.5 (6.2–6.9)    | 1.6 (1.5–1.8) | <0.0001        | 826                            | 4.2 (3.8–4.5)    |
| Very low <sup>a</sup> | 25,822                                      | 83.4 (82.8–84.0) | 1.0           |                | 21,244                           | 86.2 (85.6–86.8) | 1.0           |                | 17,759                         | 89.7 (89.1–90.2) |

47

48 <sup>a</sup> baseline/reference category

49 <sup>b</sup> the 2 older age groups (41–50 and >50) were combined as their results were similar (Supplementary Table 6 reports all 4 age groups)

50 Abbreviations: 95% CI = 95% confidence interval; MIR = multiple injury risk; OR = odds ratio.

51

52

53

54 **Supplementary Table 7.** The frequency (%),OR, and 95%CI of multiple injury risk in race entrants by age group, unadjusted.

| MIR category          | >50 years |                  |                               | 41–50 years |                  |                               | 31–40 years |                  |                               | <30 years |                  |
|-----------------------|-----------|------------------|-------------------------------|-------------|------------------|-------------------------------|-------------|------------------|-------------------------------|-----------|------------------|
|                       | <i>n</i>  | % (95% CI)       | OR (95% CI)<br><i>p</i> value | <i>n</i>    | % (95% CI)       | OR (95% CI)<br><i>p</i> value | <i>n</i>    | % (95% CI)       | OR (95% CI)<br><i>p</i> value | <i>n</i>  | % (95% CI)       |
| High                  | 67        | 0.6 (0.4–0.7)    | 2.5 (1.6–4.0)<br><0.0001      | 102         | 0.5 (0.4–0.7)    | 2.4 (1.6–3.5)<br><0.0001      | 84          | 0.3 (0.3–0.4)    | 1.5 (1.0–2.2)<br>0.0780       | 48        | 0.2 (0.2–0.3)    |
| Intermediate          | 810       | 6.8 (6.3–7.3)    | 1.2 (1.1–1.4)<br><0.0001      | 1354        | 7.1 (6.7–7.5)    | 1.3 (1.2–1.4)<br><0.0001      | 1696        | 6.9 (6.5–7.2)    | 1.2 (1.1–1.3)<br><0.0001      | 1175      | 5.9 (5.6–6.3)    |
| Low                   | 1223      | 10.3 (9.6–11.0)  | 2.7 (2.4–3.0)<br><0.0001      | 1579        | 8.3 (7. –8.8)    | 2.1 (1.9–2.4)<br><0.0001      | 1612        | 6.5 (6.2–6.9)    | 1.6 (1.5–1.8)<br><0.0001      | 826       | 4.2 (3.8–4.5)    |
| Very low <sup>a</sup> | 9799      | 82.4 (81.3–83.4) | 1.0                           | 16,023      | 84.1 (83.3–84.4) | 1.0                           | 21,244      | 86.2 (85.6–86.8) | 1.0                           | 17,759    | 89.7 (89.1–90.2) |

55

56 <sup>a</sup> baseline/reference category

57 Abbreviations: 95% CI = 95% confidence interval; MIR = multiple injury risk; OR = odds ratio.

58

59

60



61 **Supplementary Table 8.** The frequency (%),OR, and 95%CI for each multiple injury risk category in race entrants by race distance (56.0 km vs. 21.1 km)  
 62 (adjusted for sex and age group).

| MIR category          | 56 km ( <i>n</i> = 29,091) |                  |               |                | 21.1 km ( <i>n</i> = 46,310) |                  |
|-----------------------|----------------------------|------------------|---------------|----------------|------------------------------|------------------|
|                       | <i>n</i>                   | % (95%CI)        | OR (95%CI)    | <i>p</i> value | <i>n</i>                     | % (95%CI)        |
| High                  | 170                        | 0.6 (0.5–0.7)    | 2.1 (1.5–2.9) | <0.0001        | 131                          | 0.3 (0.2–0.4)    |
| Intermediate          | 2363                       | 8.1 (7.8–8.5)    | 1.5 (1.4–1.6) | <0.0001        | 672                          | 5.8 (5.5–6.0)    |
| Low                   | 2621                       | 8.5 (8.1–8.9)    | 1.5 (1.4–1.7) | <0.0001        | 2619                         | 5.9 (5.6–6.2)    |
| Very low <sup>a</sup> | 23,937                     | 82.8 (82.2–83.5) | 1.0           |                | 40,888                       | 88.0 (87.6–88.5) |

63

64 <sup>a</sup> baseline/reference category

65 Abbreviations: 95%CI = 95% confidence interval; MIR = multiple injury risk; OR = odds ratio.

66

67

68 **Supplementary Table 9.** Frequency distribution of the composite chronic disease score (CCDS)  
 69 among the race entrants and among runners with a RRI (MIR > 0).

| CCDS     | Race entrants<br>( <i>n</i> = 75,401) |            | Runners with a RRI<br>(MIR > 0)<br>( <i>n</i> = 10,576) |            |
|----------|---------------------------------------|------------|---------------------------------------------------------|------------|
|          | <i>n</i>                              | %          | <i>n</i>                                                | %          |
| 0        | 55,942                                | 74.2       | 6336                                                    | 59.9       |
| 1        | 13,950                                | 18.5       | 2749                                                    | 26.0       |
| 2        | 4109                                  | 5.5        | 1029                                                    | 9.7        |
| 3        | 1052                                  | 1.4        | 341                                                     | 3.2        |
| 4        | 249                                   | 0.3        | 87                                                      | 0.8        |
| 5        | 76                                    | 0.1        | 22                                                      | 0.2        |
| 6 (6–10) | 16 (23)                               | 0.0 (0.03) | 7 (12)                                                  | 0.1 (0.1)  |
| 7 (7–10) | 4 (7)                                 | 0.0 (0.01) | 4 (5)                                                   | 0.0 (0.05) |
| 8        | 2                                     | 0.0        | 0                                                       | 0.0        |
| 9        | 0                                     | 0.0        | 0                                                       | 0.0        |
| 10       | 1                                     | 0.0        | 1                                                       | 0.0        |

70

71 Abbreviations: CCDS = composite chronic disease score; MIR = multiple injury risk; RRI =  
 72 running-related injuries.

73

74

75 **Supplementary Table 10.** The specific chronic diseases contributing to the composite chronic disease  
 76 score among the race entrants and among runners with a RRI (MIR > 0).  
 77

| CCDS                                  | Race entrants<br>( <i>n</i> = 75,401) |      | Runners with a RRI<br>(MIR > 0)<br>( <i>n</i> = 10,576) |      |
|---------------------------------------|---------------------------------------|------|---------------------------------------------------------|------|
|                                       | <i>n</i>                              | %    | <i>n</i>                                                | %    |
| Any CVD risk factors                  | 9128                                  | 12.1 | 2052                                                    | 19.4 |
| Respiratory disease                   | 6861                                  | 9.1  | 1573                                                    | 14.9 |
| GIT disease                           | 1977                                  | 2.6  | 602                                                     | 5.7  |
| Nervous system/Psychiatric<br>disease | 1791                                  | 2.4  | 458                                                     | 4.3  |
| Metabolic/Endocrine disease           | 2069                                  | 2.7  | 447                                                     | 4.2  |
| History of CVD                        | 1382                                  | 1.8  | 371                                                     | 3.5  |
| Kidney/Bladder disease                | 1079                                  | 1.4  | 276                                                     | 2.6  |
| Symptoms of CVD                       | 815                                   | 1.1  | 236                                                     | 2.2  |
| Cancer                                | 1176                                  | 1.6  | 216                                                     | 2.0  |
| Haematological/Immune disease         | 572                                   | 0.8  | 137                                                     | 1.3  |

78

79 Abbreviations: CCDS = composite chronic disease score; CVD = cardiovascular disease; MIR =  
 80 multiple injury risk; RRI = running-related injuries.

81

82

83

84
